# Supplementary material
Source: PubMed Central journal article supplement (PMC7778419)
Supplement: 11109_2020_9662_MOESM1_ESM.pdf [file 11109_2020_9662_MOESM1_ESM.pdf]

# Supplemental Appendix:

## “Why Me?’ The Role of Perceived Victimhood in American Politics”

### Contents

|    |                                                  |    |
|----|--------------------------------------------------|----|
| 1  | Variable Details, 2019 Lucid Data                | 1  |
| 2  | Variable Details, 2020 Lucid Data                | 8  |
| 3  | Variable Details, 2020 MTurk Data                | 14 |
| 4  | Sample Characteristics                           | 17 |
| 5  | Distributions of Individual Victimhood Items     | 18 |
| 6  | Distributions of Perceived Victimhood Scales     | 20 |
| 7  | Replicated Victimhood CFA Model, 2020 Lucid Data | 21 |
| 8  | Full Correlation Matrix for Table 3              | 22 |
| 9  | Details of Discriminant Validity Analysis        | 23 |
| 10 | Full Victimizer Model Estimates                  | 24 |
| 11 | Candidate Support Model Estimates                | 25 |
| 12 | Racial Attitude Model Estimates                  | 26 |
| 13 | Experimental Treatments                          | 27 |
| 14 | Full Experimental Results                        | 28 |

# 1 Variable Details, 2019 Lucid Data

**Systemic victimhood**, all on five-point “strongly disagree” to “strongly agree” scale (responses averaged across items,  $\alpha = 0.78$ ):

- The system works against people like me
- I feel that the world is “doing it” to me and that there is nothing I can do about it
- The world is out to get me
- The system is rigged to benefit a select few

**Egocentric victimhood**, all on five-point “strongly disagree” to “strongly agree” scale (responses averaged across items,  $\alpha = 0.86$ ):

- I rarely get what I deserve in life
- Great things never come to me
- I usually have to settle for less
- I never seem to get an extra break

**Conspiratorial thinking**, all on five-point “strongly disagree” to “strongly agree” scale (responses averaged across items,  $\alpha = 0.78$ ):

- Unseen patterns and secret activities can be found everywhere in politics.
- Much of our lives are being controlled by plots hatched in secret places.
- Even though we live in a democracy, a few people will always run things anyway.
- The people who really “run” the country, are not known to the voters.
- Many very important things happen in the world, which the public is never informed about.

**Racial resentment**, all on five-point “strongly disagree” to “strongly agree” scale (responses averaged across items,  $\alpha = 0.78$ ):

- Irish, Italians, Jewish and many other minorities overcame prejudice and worked their way up. Blacks should do the same without any special favors.
- Generations of slavery and discrimination have created conditions that make it difficult for blacks to work their way out of the lower class.
- Over the past few years, blacks have gotten less than they deserve.
- It’s really a matter of some people not trying hard enough; if blacks would only try harder they could be just as well off as whites.

**Anti-elitism**, both on five-point “strongly disagree” to “strongly agree” scale (responses averaged across items):

- I’d rather put my trust in the wisdom of ordinary people than the opinions of experts and intellectuals.
- When it comes to really important questions, scientific facts don’t help very much.

**Trust:** “How often can you trust the federal government in Washington to do what is right?”

1. Never
2. Sometimes
3. About half the time
4. Most of the time
5. Always

**Perceived corruption:** “How many of the people running the government would you say are corrupt?”

1. None
2. A few
3. About half
4. Most
5. All

**Anti-political correctness:** “Some people think that the way people talk needs to change with the times to be more sensitive to people from different backgrounds. Others think that this has already gone too far and many people are just too easily offended. Which is closer to your opinion?”

1. The way people talk needs to change a lot
2. The way people talk needs to change a little
3. People are a little too easily offended
4. People are much too easily offended

**Build the wall:** “Do you favor, oppose, or neither favor nor oppose building a wall on the U.S. border with Mexico?”

1. Oppose
2. Neither favor, nor oppose
3. Favor

**Government help for Blacks:** “Some people feel that the government in Washington should make every effort to improve the social and economic position of blacks (0). Others feel that the government should not make any special effort to help blacks because they

should help themselves (10). And, of course, some other people have opinions somewhere in between (1-9). Where would you place yourself on this scale, or haven't you thought much about this?"

**Emotional stability:** "Please indicate the extent to which you agree or disagree that the statement describes you. You should rate the extent to which the pair of traits applies to you, even if one characteristic applies more strongly than the other. (Both on five-point "strongly disagree" to "strongly agree" scale, responses averaged across items):

- Calm, emotionally stable
- Anxious, easily upset

**Agreeableness:** "Please indicate the extent to which you agree or disagree that the statement describes you. You should rate the extent to which the pair of traits applies to you, even if one characteristic applies more strongly than the other. (Both on five-point "strongly disagree" to "strongly agree" scale, responses averaged across items):

- Critical, quarrelsome
- Sympathetic, warm

**Donald Trump thermometer:** "We'd like to get your feelings toward some of the political institutions and figures in our country. Below we list the names of several political figures and parties, and we'd like you to rate them using something called the feeling thermometer. Ratings between 50 degrees and 100 degrees mean that you feel favorable and warm toward the party or person. Ratings between 0 degrees and 50 degrees mean that you don't feel favorable toward the person or party and that you don't care too much for that person or party. You would rate the person or party at the 50 degree mark if you don't feel particularly warm or cold toward the person or party." 0-100.

**Partisanship** (standard seven-point branching measure)

1. Strong Democrat
2. Democrat
3. Lean Democrat
4. Independent
5. Lean Republican
6. Republican
7. Strong Republican

**Ideological self-identification:** “We hear a lot of talk these days about liberals and conservatives. When it comes to politics, how do you think about yourself?”

1. Extremely liberal
2. Liberal
3. Slightly liberal
4. Moderate, middle of the road
5. Slightly conservative
6. Conservative
7. Extremely conservative

**Entitlement:** all on five-point “strongly disagree” to “strongly agree” scale (responses averaged across items,  $\alpha = 0.85$ ):

1. I honestly feel I’m just more deserving than others
2. Great things should come to me

3. I demand the best because I'm worth it
4. Things should go my way

**Interest in politics:** "How interested would you say you are in politics?"

1. Not much interested
2. Somewhat interested
3. Very interested

**Religiosity:** "Do you go to religious services every week, almost every week, once or twice a month, a few times a year, or never?"

1. Never
2. A few times a year
3. Once or twice a month
4. Almost every week
5. Every week

**Education**

1. Did not graduate high school
2. High school diploma or equivalent (GED)
3. Some college but no degree
4. Bachelor's degree (BA, BS)
5. Graduate degree (MA, MS, MD, PhD)

**Female**

0. Male

1. Female

**Black**

0. Not black

1. Black

**Hispanic**

0. Not hispanic

1. Hispanic

**Residence in South**

0. Not South

1. South



## 2 Variable Details, 2020 Lucid Data

**Systemic victimhood**, all on five-point “strongly disagree” to “strongly agree” scale (responses averaged across items,  $\alpha = 0.81$ ):

- The system works against people like me
- I feel that the world is “doing it” to me and that there is nothing I can do about it
- The world is out to get me
- The system is rigged to benefit a select few

**Egocentric victimhood**, all on five-point “strongly disagree” to “strongly agree” scale (responses averaged across items,  $\alpha = 0.85$ ):

- I rarely get what I deserve in life
- Great things never come to me
- I usually have to settle for less
- I never seem to get an extra break

**Trait narcissism**: all on five-point “strongly disagree” to “strongly agree” scale (responses averaged across items,  $\alpha = 0.80$ ):

1. I deserve to be seen as a great personality
2. Being a very special person gives me a lot of strength
3. I manage to be the center of attention with my outstanding contributions
4. Most people are somehow losers
5. I want my rivals to fail

6. I react annoyed if another person steals the show from me

**Collective narcissism:** all on five-point “strongly disagree” to “strongly agree” scale (responses averaged across items,  $\alpha = 0.87$ ):

1. I wish other groups would more quickly recognize the authority of my group
2. My group deserves special treatment
3. I will never be satisfied until my group gets all it deserves
4. I insist upon my group getting the respect that is due to it
5. If my group had a major say in the world, the world would be a much better place
6. I do not get upset when people do not notice achievements of my group (reversed)
7. Not many people seem to fully understand the importance of my group
8. The true worth of my group is often misunderstood

**State narcissism:** all on five-point “strongly disagree” to “strongly agree” scale (responses averaged across items,  $\alpha = 0.84$ ):

1. Right now, I feel I deserve more than other people do
2. Right now, I feel like I would make a good leader
3. Right now, I feel I am more capable than other people
4. Right now, I feel I should be given more attention than other people
5. Right now, I feel I am an exceptional person
6. Right now, I feel I can read people like a book
7. Right now, I feel like looking at my body

**General system justification:** all on five-point “strongly disagree” to “strongly agree” scale (responses averaged across items,  $\alpha = 0.85$ ):

1. In general, the United States is just and fair
2. In general, American society operates as it should
3. The United States needs to be restructured (reversed)
4. America is the best country in the world
5. America serves the greatest good for its citizens
6. Everyone in America has a fair shot at wealth and happiness
7. America is getting worse every year (reversed)
8. America is set up so that people usually get what they deserve

**Relative deprivation:** “Over the last 5 years, would you say that people like yourself in the U.S. have been economically:”

1. A lot better off
2. Better off
3. The same
4. Worse off
5. A lot worse off

**Relative group deprivation:** “Would you say that over the last 5 years people like yourself living in the U.S. have been better off economically than most immigrants living here?”

1. A lot better off than immigrants living here

2. Better off than immigrants living here
3. The same as immigrants living here
4. Worse off than immigrants living here
5. A lot worse off than immigrants living here

**Victimizers:** “How often do you feel personally victimized by the following entities?”

(1=never, 2=rarely, 3=sometimes, 4=very frequently)

1. The political system
2. The federal government
3. The Democratic Party
4. The Republican Party
5. The economy
6. The other side
7. Socialists
8. The judicial system

**Partisanship** (standard seven-point branching measure)

1. Strong Democrat
2. Democrat
3. Lean Democrat
4. Independent
5. Lean Republican

6. Republican

7. Strong Republican

**Ideological self-identification:** “We hear a lot of talk these days about liberals and conservatives. When it comes to politics, how do you think about yourself?”

1. Extremely liberal

2. Liberal

3. Slightly liberal

4. Moderate, middle of the road

5. Slightly conservative

6. Conservative

7. Extremely conservative

### **Education**

1. Did not graduate high school

2. High school diploma or equivalent (GED)

3. Some college but no degree

4. Bachelor’s degree (BA, BS)

5. Graduate degree (MA, MS, MD, PhD)

### **Female**

0. Male

1. Female

**Black**

0. Not black

1. Black

**Hispanic**

0. Not hispanic

1. Hispanic

**Residence in South**

0. Not South

1. South

### 3 Variable Details, 2020 MTurk Data

**Systemic victimhood**, all on five-point “strongly disagree” to “strongly agree” scale (responses averaged across items,  $\alpha = 0.82$ ):

- The system works against people like me
- I feel that the world is “doing it” to me and that there is nothing I can do about it
- The world is out to get me
- The system is rigged to benefit a select few

**Egocentric victimhood**, all on five-point “strongly disagree” to “strongly agree” scale (responses averaged across items,  $\alpha = 0.92$ ):

- I rarely get what I deserve in life
- Great things never come to me
- I usually have to settle for less
- I never seem to get an extra break

**Narcissism**: all on five-point “strongly disagree” to “strongly agree” scale (responses averaged across items,  $\alpha = 0.87$ ):

1. I tend to want others to admire me
2. I tend to want others to pay attention to me
3. I tend to seek prestige or status
4. I tend to expect special favors from others

**Entitlement**: all on five-point “strongly disagree” to “strongly agree” scale (responses averaged across items,  $\alpha = 0.85$ ):

1. I honestly feel I'm just more deserving than others
2. Great things should come to me
3. I demand the best because I'm worth it
4. Things should go my way

**Partisanship** (standard seven-point branching measure)

1. Strong Democrat
2. Democrat
3. Lean Democrat
4. Independent
5. Lean Republican
6. Republican
7. Strong Republican

**Ideological self-identification:** "We hear a lot of talk these days about liberals and conservatives. When it comes to politics, how do you think about yourself?"

1. Extremely liberal
2. Liberal
3. Slightly liberal
4. Moderate, middle of the road
5. Slightly conservative
6. Conservative



7. Extremely conservative

### **Education**

1. Did not graduate high school
2. High school diploma or equivalent (GED)
3. Some college but no degree
4. Bachelor's degree (BA, BS)
5. Graduate degree (MA, MS, MD, PhD)

### **Female**

0. Male
1. Female

### **White**

0. Not white
1. White

## 4 Sample Characteristics

**Table A1:** Demographic characteristics from 2019 and 2020 Lucid samples.

| Characteristic (range)  | 2019<br>Mean | 2020<br>Mean | Census<br>Estimate |
|-------------------------|--------------|--------------|--------------------|
| Age (18-86)             | 43*          | 41*          | 38.1               |
| Household income (1-24) | 8.41**       | 8.22**       | 10                 |
| Female (%)              | 50.95        | 49.82        | 50.8               |
| Party ID (1-7)          | 3.83         | 4.05         | 3.70***            |
| Ideology (1-7)          | 3.04         | 3.96         | 3.35***            |
| Race:                   |              |              |                    |
| White (%)               | 72.43        | 71.39        | 72.4               |
| Black (%)               | 12.19        | 13.47        | 12.6               |
| Hispanic (%)            | 11.69        | 12.75        | 16.3               |
| Region:                 |              |              |                    |
| Northeast (%)           | 18.08        | 21.10        | 17.2               |
| Midwest (%)             | 18.98        | 19.43        | 20.9               |
| South (%)               | 37.86        | 38.38        | 38.1               |
| West (%)                | 25.07        | 21.10        | 23.8               |

\* Median used.

\*\* \$45,000 to \$49,999.

\*\*\* Value from 2018 ANES Pilot.

# 5 Distributions of Individual Victimhood Items

Figure A1: Histograms of responses to individual systemic victimhood items. 2019 Lucid.

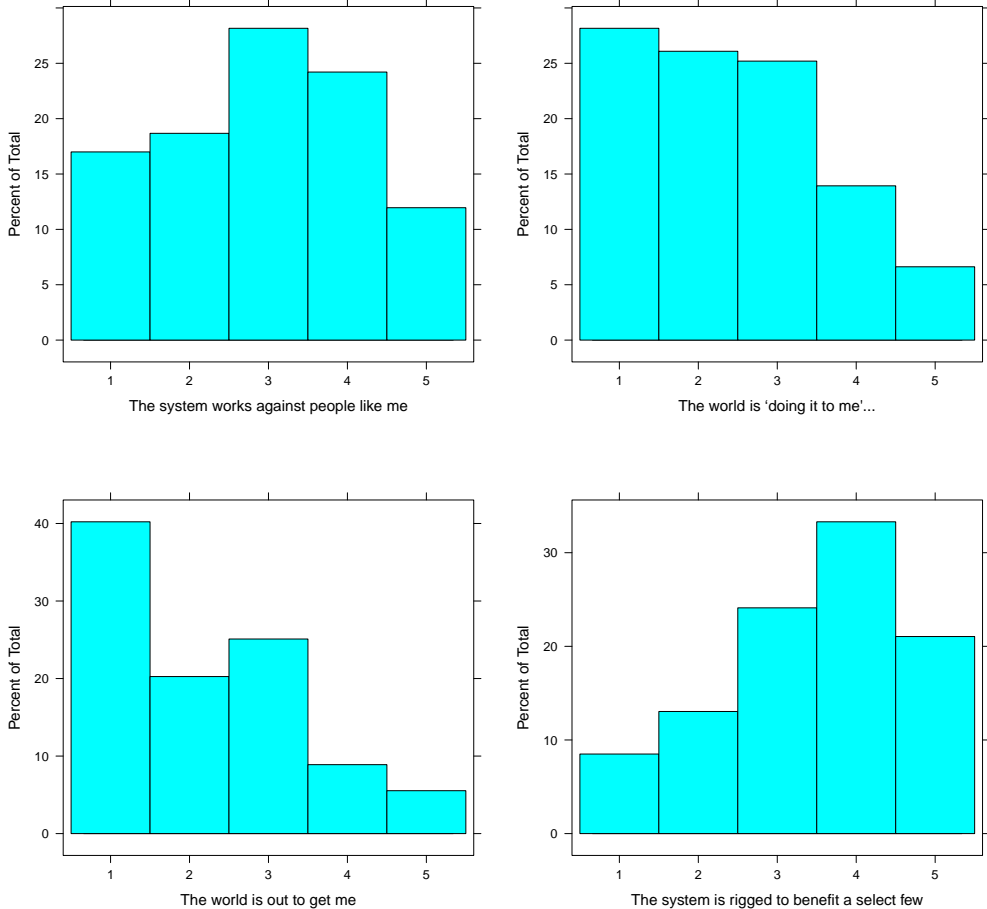

**Figure A2:** Histograms of responses to individual **egocentric** victimhood items. 2019  
Lucid.

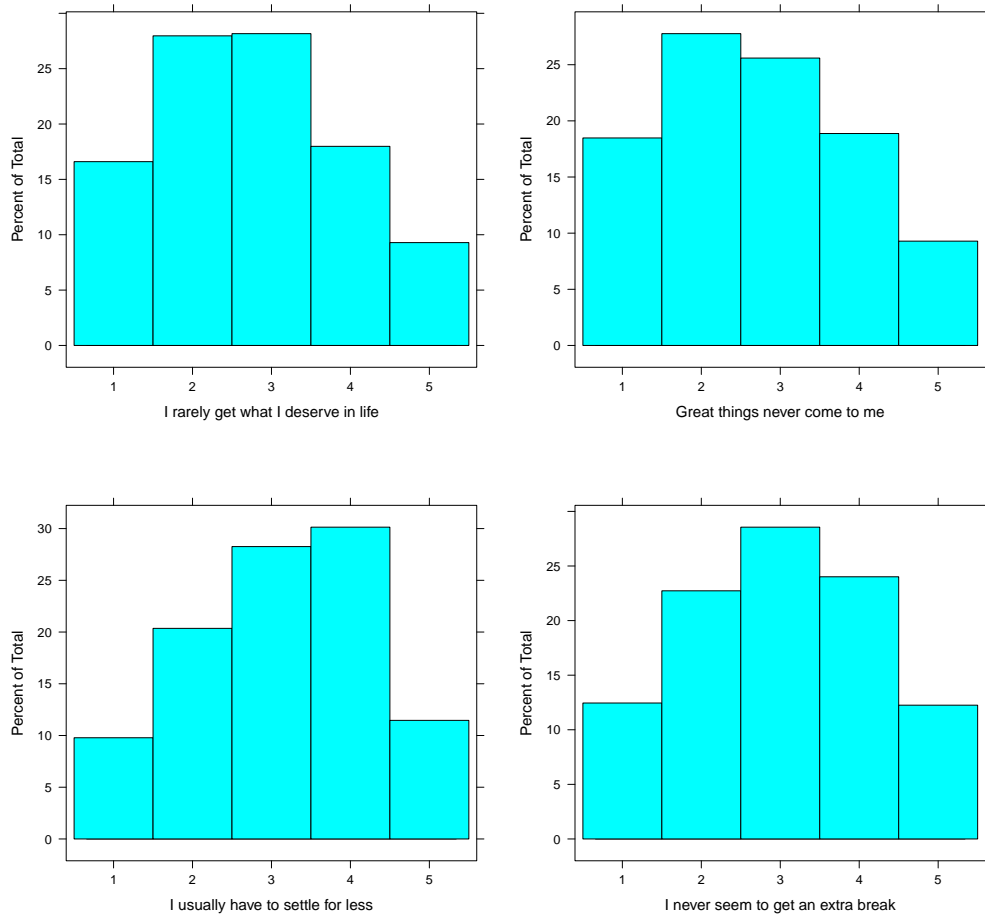

# 6 Distributions of Perceived Victimhood Scales

Figure A3: Histograms of systemic and egocentric victimhood scales, and scatterplot of the relationship between the two (black line is lowess smoother). 2019 Lucid.

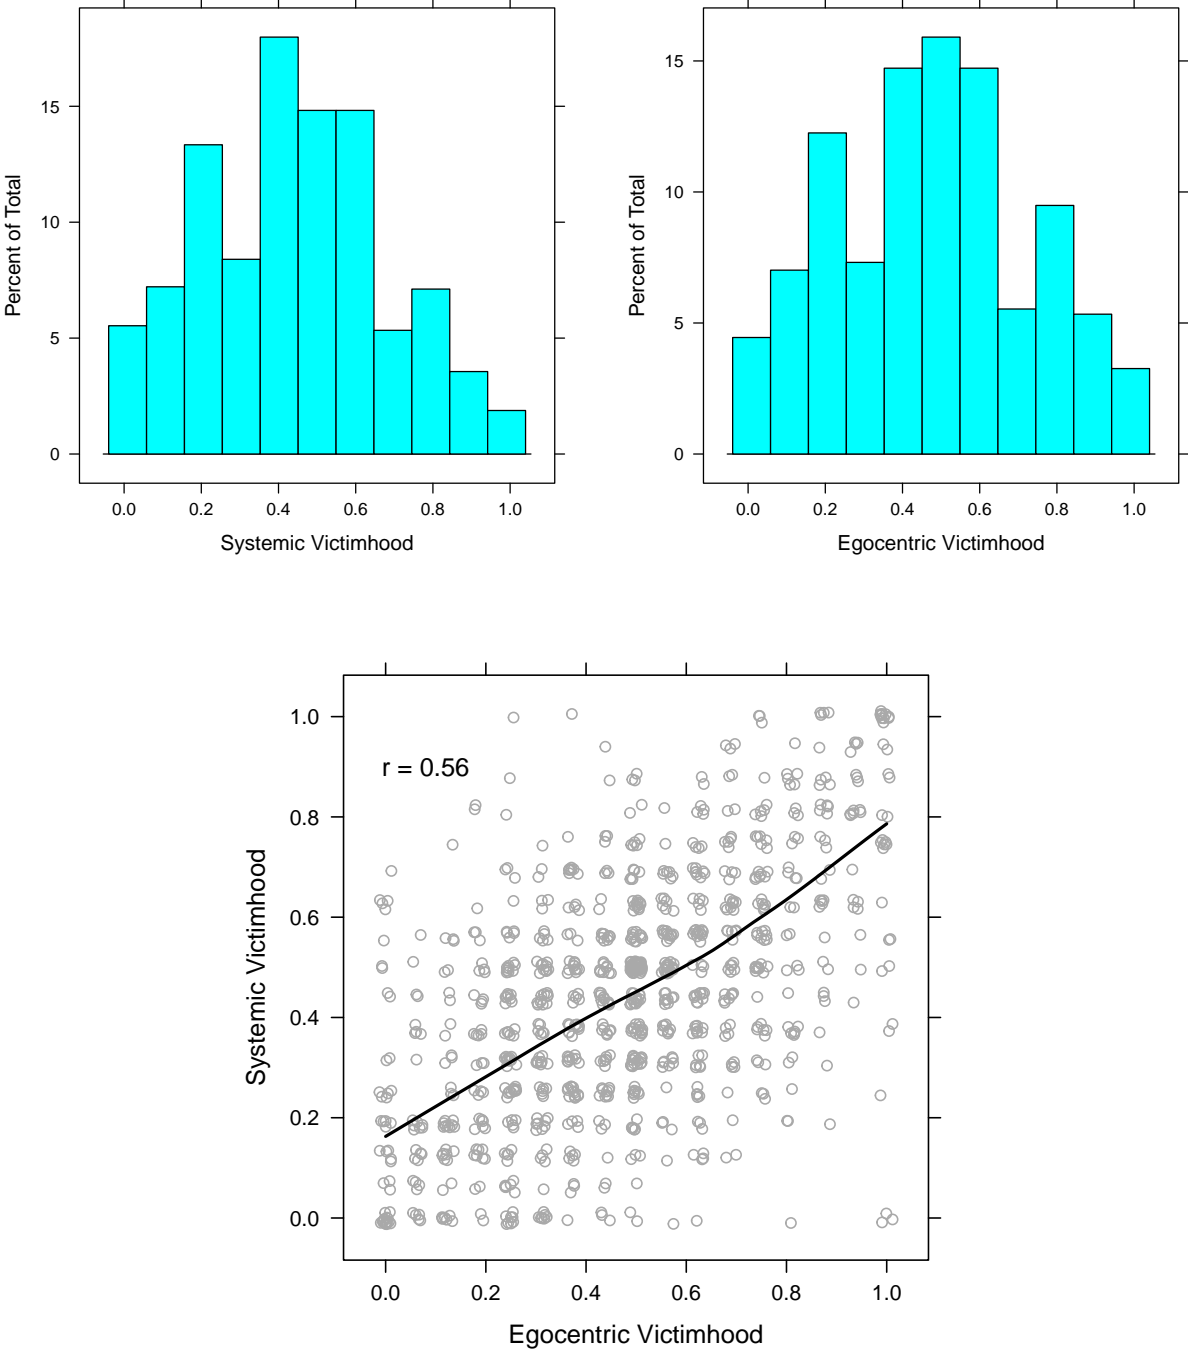

## 7 Replicated Victimhood CFA Model, 2020 Lucid Data

**Table A2:** Confirmatory factor analysis of the two-factor structure underlying responses to the systemic and egocentric victimhood items. 2020 Lucid.

|                                                                         | Systemic<br>Factor | Egocentric<br>Factor |
|-------------------------------------------------------------------------|--------------------|----------------------|
| <b>Systemic Items</b>                                                   |                    |                      |
| 1) The system works against people like me.                             | 0.676<br>(0.025)   |                      |
| 2) The world is “doing it” to me and there’s nothing I can do about it. | 0.854<br>(0.017)   |                      |
| 3) The world is out to get me.                                          | 0.796<br>(0.019)   |                      |
| 4) The system is rigged to benefit a select few.                        | 0.493<br>(0.033)   |                      |
| <b>Egocentric Items</b>                                                 |                    |                      |
| 1) I rarely get what I deserve in life.                                 |                    | 0.843<br>(0.015)     |
| 2) Great things never come to me.                                       |                    | 0.759<br>(0.020)     |
| 3) I usually have to settle for less.                                   |                    | 0.726<br>(0.022)     |
| 4) I never seem to get an extra break.                                  |                    | 0.793<br>(0.018)     |
| <b>Fit Statistics</b>                                                   |                    |                      |
| $\chi^2$ (18 df), <i>p</i> -value                                       | 58.26, 0.000       |                      |
| RMSEA                                                                   | 0.059              |                      |
| Prob(RMSEA $\leq$ 0.05)                                                 | 0.185              |                      |
| SRMR                                                                    | 0.027              |                      |
| CFI                                                                     | 0.985              |                      |
| TLI                                                                     | 0.976              |                      |
| <i>n</i>                                                                | 653                |                      |

Standardized MLE coefficients with standard errors in parentheses. All estimates statistically significant at the  $p < 0.001$  level w/ respect to a two-tailed test.

## 8 Full Correlation Matrix for Table 3

**Table A3:** Full Pearson product moment correlation matrix associated with Table 3. 2020 Lucid.

|                                | Systemic | (2)     | (3)     | (4)     | (5)     | (6)     | (7)    |
|--------------------------------|----------|---------|---------|---------|---------|---------|--------|
| (2) Egocentric                 | 0.648*   |         |         |         |         |         |        |
| (3) State Narcissism           | 0.291*   | 0.299*  |         |         |         |         |        |
| (4) Trait Narcissism           | 0.355*   | 0.373*  | 0.692*  |         |         |         |        |
| (5) Collective Narcissism      | 0.360*   | 0.372*  | 0.559*  | 0.561*  |         |         |        |
| (6) System Justification       | -0.314*  | -0.149* | 0.146*  | 0.093*  | 0.017   |         |        |
| (7) Relative Deprivation       | 0.156*   | 0.163*  | -0.194* | -0.187* | -0.082* | -0.501* |        |
| (8) Relative Group Deprivation | 0.150*   | 0.203*  | -0.012  | -0.024  | 0.013   | -0.043  | 0.295* |

\* significant at  $p < 0.05$  level;  $n$  ranges from 649-651

## 9 Details of Discriminant Validity Analysis

We use the procedure developed by Fornell and Larcker (1981) to test for discriminant (or “divergent”) validity. The basic idea is to compare the average amount of shared variance across a set of indicators accounted for by a single factor (AVE) to the proportion of variance shared between two constructs. If two constructs are divergent – i.e., they do not overlap so much that we should not treat them as distinct – then the AVEs for both constructs involved in a comparison (say, systemic victimhood and trait narcissism) should be greater than the squared correlation between those constructs.

We estimate the AVE and squared correlation in the CFA framework. For each of the four variables in Table A4 we estimate a CFA with the systemic victimhood indicators loading on a single factor, the egocentric indicators loading on a single factor, and the indicators of the variable of interest loading on single factor. We then average the squared standardized factor loadings for each of the three factors – these are the AVEs in Table A4. The squared correlations are the squared standardized factor covariances. In no case is the squared correlation between a given variable and either systemic or egocentric victimhood equal to or larger than the AVEs.

**Table A4:** Average variance extracted (AVE) for each psychological construct and CFA-based correlations with both types of victimhood. 2020 Lucid.

|                       | <u>Average Variance Extracted</u> |                 |                   | <u>Squared Correlation with:</u> |                   |
|-----------------------|-----------------------------------|-----------------|-------------------|----------------------------------|-------------------|
|                       | <u>Variable</u>                   | <u>Systemic</u> | <u>Egocentric</u> | <u>Systemic</u>                  | <u>Egocentric</u> |
| Trait Narcissism      | 0.40                              | 0.53            | 0.59              | 0.31                             | 0.25              |
| State Narcissism      | 0.43                              | 0.53            | 0.59              | 0.21                             | 0.19              |
| Collective Narcissism | 0.48                              | 0.53            | 0.59              | 0.25                             | 0.24              |
| System Justification  | 0.43                              | 0.53            | 0.59              | 0.00                             | 0.00              |



## 10 Full Victimizer Model Estimates

**Table A5:** OLS regressions of perceived victimizers on both types of victimhood and controls. 2020 Lucid.

|              | Political<br>System | Federal<br>Government | Democratic<br>Party | Republican<br>Party | Economy          | Other<br>Side    | Socialists       | Judiciary        |
|--------------|---------------------|-----------------------|---------------------|---------------------|------------------|------------------|------------------|------------------|
| Egocentric   | 0.09<br>(0.19)      | 0.138<br>(0.20)       | 0.139<br>(0.21)     | 0.035<br>(0.20)     | 0.459<br>(0.19)  | 0.207<br>(0.22)  | 0.388<br>(0.21)  | 0.337<br>(0.20)  |
| Systemic     | 1.577<br>(0.19)     | 1.481<br>(0.20)       | 1.165<br>(0.21)     | 1.432<br>(0.20)     | 1.42<br>(0.19)   | 1.411<br>(0.22)  | 1.324<br>(0.21)  | 1.57<br>(0.20)   |
| Partisanship | -0.233<br>(0.12)    | -0.43<br>(0.12)       | 0.946<br>(0.13)     | -1.077<br>(0.13)    | -0.141<br>(0.12) | -0.09<br>(0.14)  | 0.539<br>(0.13)  | -0.021<br>(0.12) |
| Ideology     | -0.062<br>(0.15)    | -0.172<br>(0.15)      | 0.657<br>(0.16)     | -0.601<br>(0.16)    | -0.353<br>(0.14) | 0.423<br>(0.17)  | 1.034<br>(0.16)  | 0.014<br>(0.15)  |
| Education    | -0.008<br>(0.14)    | -0.031<br>(0.14)      | -0.163<br>(0.15)    | 0.285<br>(0.15)     | 0.006<br>(0.13)  | 0.205<br>(0.16)  | -0.125<br>(0.15) | -0.333<br>(0.14) |
| Age          | 0.115<br>(0.16)     | 0.233<br>(0.16)       | 0.238<br>(0.17)     | 0.121<br>(0.17)     | 0.048<br>(0.15)  | 0.126<br>(0.18)  | 0.124<br>(0.17)  | -0.334<br>(0.16) |
| Female       | -0.092<br>(0.07)    | -0.078<br>(0.08)      | -0.154<br>(0.08)    | -0.154<br>(0.08)    | 0.024<br>(0.07)  | -0.015<br>(0.08) | -0.058<br>(0.08) | -0.156<br>(0.08) |
| Black        | 0.101<br>(0.13)     | -0.07<br>(0.14)       | 0.28<br>(0.15)      | 0.014<br>(0.14)     | -0.016<br>(0.13) | 0.153<br>(0.15)  | 0.082<br>(0.15)  | 0.271<br>(0.14)  |
| Hispanic     | -0.091<br>(0.14)    | -0.091<br>(0.14)      | 0.061<br>(0.15)     | 0.005<br>(0.14)     | 0.025<br>(0.13)  | -0.109<br>(0.15) | 0.121<br>(0.15)  | 0.103<br>(0.14)  |
| South        | 0.062<br>(0.08)     | 0.137<br>(0.08)       | 0.017<br>(0.08)     | -0.007<br>(0.08)    | 0.117<br>(0.08)  | 0.043<br>(0.09)  | 0.032<br>(0.08)  | 0.133<br>(0.08)  |
| Treated      | -0.114<br>(0.07)    | -0.112<br>(0.07)      | -0.195<br>(0.08)    | 0.027<br>(0.08)     | -0.239<br>(0.07) | 0.008<br>(0.08)  | -0.107<br>(0.08) | -0.081<br>(0.08) |
| Constant     | 2.091<br>(0.17)     | 2.117<br>(0.17)       | 1.103<br>(0.18)     | 2.506<br>(0.18)     | 2.078<br>(0.16)  | 1.483<br>(0.19)  | 0.761<br>(0.18)  | 1.834<br>(0.17)  |
| $R^2$        | 0.219               | 0.226                 | 0.295               | 0.382               | 0.271            | 0.153            | 0.292            | 0.194            |
| $n$          | 554                 | 555                   | 554                 | 553                 | 554              | 552              | 553              | 555              |

OLS coefficients with standard errors in parentheses.

## 11 Candidate Support Model Estimates

**Table A6:** Regressions of 2016 Trump vote choice and feelings toward Trump on systemic and egocentric victimhood. 2019 Lucid.

|                       | Trump<br>Vote      | Trump<br>Affect    |
|-----------------------|--------------------|--------------------|
| Systemic Victimhood   | -1.551*<br>(0.765) | -0.111*<br>(0.050) |
| Egocentric Victimhood | 1.691*<br>(0.685)  | 0.148*<br>(0.046)  |
| Party Identification  | 5.500*<br>(0.523)  | 0.618*<br>(0.034)  |
| Ideology              | 0.613<br>(0.615)   | 0.154*<br>(0.042)  |
| Education             | -0.086<br>(0.581)  | -0.046<br>(0.041)  |
| Religiosity           | 1.115*<br>(0.367)  | 0.107*<br>(0.025)  |
| Interest in Campaign  | 0.210<br>(0.499)   | 0.139*<br>(0.034)  |
| Age                   | 0.821<br>(0.592)   | 0.010<br>(0.042)   |
| Female                | -0.301<br>(0.265)  | -0.020<br>(0.019)  |
| Black                 | -0.973*<br>(0.493) | -0.062*<br>(0.031) |
| Hispanic              | 0.095<br>(0.068)   | 0.006<br>(0.006)   |
| South                 | 0.141<br>(0.286)   | 0.015<br>(0.020)   |
| (pseudo-) $R^2$       | 0.530              | 0.540              |
| $n$                   | 614                | 803                |

Logit coefficients in column 1, OLS in column 2.

\* significant at  $p < 0.05$ .

## 12 Racial Attitude Model Estimates

**Table A7:** OLS regressions of populist, conspiratorial, and racist orientations on systemic and egocentric victim identity. 2019 Lucid.

|                       | Gov. Aid<br>to Blacks | Build<br>the Wall  | Anti-PC            | Racial<br>Resentment |
|-----------------------|-----------------------|--------------------|--------------------|----------------------|
| Systemic Victimhood   | -0.116*<br>(0.045)    | -0.099<br>(0.067)  | -0.258*<br>(0.064) | -0.035*<br>(0.013)   |
| Egocentric Victimhood | 0.142*<br>(0.041)     | 0.201*<br>(0.061)  | 0.124*<br>(0.058)  | 0.028*<br>(0.011)    |
| Party Identification  | 0.119*<br>(0.031)     | 0.569*<br>(0.046)  | 0.116*<br>(0.043)  | 0.028*<br>(0.008)    |
| Ideology              | 0.205*<br>(0.038)     | 0.289*<br>(0.057)  | 0.354*<br>(0.054)  | 0.079*<br>(0.011)    |
| Education             | -0.006<br>(0.037)     | -0.211*<br>(0.055) | -0.108*<br>(0.052) | -0.040*<br>(0.010)   |
| Church Attendance     | 0.017<br>(0.023)      | 0.064<br>(0.034)   | -0.122*<br>(0.032) | 0.002<br>(0.006)     |
| Interest in Politics  | 0.005<br>(0.031)      | 0.062<br>(0.046)   | -0.061<br>(0.043)  | -0.004<br>(0.009)    |
| Age                   | 0.013<br>(0.038)      | 0.130*<br>(0.055)  | 0.122*<br>(0.053)  | 0.020<br>(0.010)     |
| Female                | -0.027<br>(0.017)     | -0.001<br>(0.026)  | 0.006<br>(0.024)   | -0.003<br>(0.005)    |
| Black                 | -0.014<br>(0.028)     | 0.036<br>(0.042)   | -0.078*<br>(0.039) | -0.028*<br>(0.008)   |
| Hispanic              | 0.002<br>(0.005)      | 0.002<br>(0.008)   | -0.007<br>(0.007)  | -0.003<br>(0.001)    |
| South                 | 0.008<br>(0.018)      | -0.001<br>(0.026)  | -0.005<br>(0.025)  | -0.009<br>(0.005)    |
|                       | $R^2$                 | 0.175              | 0.430              | 0.239                |
|                       | $n$                   | 803                | 784                | 801                  |

OLS regression coefficients w/ standard errors in parentheses.

\* significant at  $p < 0.05$  level w/ respect to a two-tailed test.

## 13 Experimental Treatments

### I. Self-Induced Treatment

We're interested in how people react to the political world. In particular, we'd like to hear about a time that you felt as if you were the victim of someone or something in politics, like a politician, party, or policy. Describe how you felt as vividly and in as much detail as possible.

Think about the way the issues are talked about, recent court cases, and real world events. For example, other people said that they've fallen victim to statements made in the media, particular policies, or how politicians discuss people like them. It's okay if you don't remember all the details, just be specific as possible. Take a few minutes to write out your answer. You will not be able to proceed until you have written something.

### II. Elite Cueing Treatment

#### **Trump variant:**

*Please read the following excerpt from an Associated Press story published in February 2020 (you will not be able to proceed until some time has elapsed):*

At a campaign rally in Greensboro, North Carolina, Donald Trump continued to make his case to the public in anticipation of the 2020 presidential election. He discussed many issues from immigration to trade and the economy. One common theme of the speech was the burdens that average Americans have been facing.

He remarked, "You, the middle class and working people, have been the victims of so much. You never seem to catch a break, and always seem to pay the steepest price. It's sad, it really is. And I'm going to keep fighting for you no matter what."

#### **Biden variant:**

*Please read the following excerpt from an Associated Press story published in February 2020 (you will not be able to proceed until some time has elapsed):*

At a campaign rally in Greensboro, North Carolina, Democratic presidential candidate Joe Biden continued to make his case to the public in anticipation of the 2020 presidential election. He discussed many issues from immigration to trade and the economy. One common theme of the speech was the burdens that average Americans have been facing.

He remarked, "You, the middle class and working people, have been the victims of so much. You never seem to catch a break, and always seem to pay the steepest price. It's sad, it really is. And I'm going to keep fighting for you no matter what."

## 14 Full Experimental Results

**Table A8:** Regressions of victimhood onto self-induced treatment, with controls. 2020 MTurk.

|                        | Systemic | Egocentric |
|------------------------|----------|------------|
| Self-induced Treatment | 0.065*   | 0.065*     |
|                        | (0.029)  | (0.032)    |
| Partisanship           | -0.093*  | -0.013     |
|                        | (0.042)  | (0.047)    |
| Education              | 0.038    | 0.021      |
|                        | (0.080)  | (0.090)    |
| Age                    | -0.157*  | -0.080     |
|                        | (0.057)  | (0.073)    |
| Income                 | -0.258*  | -0.311*    |
|                        | (0.055)  | (0.059)    |
| Female                 | -0.101*  | -0.094*    |
|                        | (0.027)  | (0.027)    |
| White                  | -0.019   | -0.052     |
|                        | (0.033)  | (0.037)    |
| Constant               | 0.661*   | 0.634*     |
|                        | (0.071)  | (0.080)    |
| $R^2$                  | 0.167    | 0.149      |
| $n$                    | 281      | 281        |

Bootstrapped standard errors (500 reps)

\* significant at  $p < 0.05$  level

**Table A9:** Regressions of victimhood onto self-induced treatment, without controls. 2020 MTurk.

|                        | Systemic          | Egocentric        |
|------------------------|-------------------|-------------------|
| Self-induced Treatment | 0.067*<br>(0.034) | 0.069*<br>(0.031) |
| Constant               | 0.392*<br>(0.017) | 0.364*<br>(0.017) |
| $R^2$                  | 0.016             | 0.015             |
| $n$                    | 311               | 311               |

Bootstrapped standard errors (500 reps)

\* significant at  $p < 0.05$  level

**Table A10:** Regressions of victimhood onto elite cue treatment, with controls. 2020 MTurk.

|                            | Systemic           | Egocentric         |
|----------------------------|--------------------|--------------------|
| Elite Message Treatment    | 0.048*<br>(0.023)  | 0.088*<br>(0.027)  |
| Independent Identification | 0.129<br>(0.068)   | 0.111<br>(0.063)   |
| Education                  | 0.085<br>(0.071)   | 0.058<br>(0.097)   |
| Age                        | -0.128*<br>(0.060) | -0.060<br>(0.072)  |
| Income                     | -0.251*<br>(0.045) | -0.292*<br>(0.047) |
| Female                     | -0.084*<br>(0.026) | -0.106*<br>(0.027) |
| White                      | -0.060<br>(0.033)  | -0.060<br>(0.035)  |
| Constant                   | 0.576*<br>(0.067)  | 0.583*<br>(0.090)  |
| $R^2$                      | 0.143              | 0.149              |
| $n$                        | 340                | 340                |

Bootstrapped standard errors (500 reps)

\* significant at  $p < 0.05$  level

**Table A11:** Regressions of victimhood onto elite cue treatment, without controls. 2020 MTurk.

|                         | Systemic          | Egocentric        |
|-------------------------|-------------------|-------------------|
| Elite Message Treatment | 0.020<br>(0.027)  | 0.070*<br>(0.029) |
| Constant                | 0.392*<br>(0.020) | 0.364*<br>(0.022) |
| $R^2$                   | 0.002             | 0.016             |
| $n$                     | 379               | 379               |

Bootstrapped standard errors (500 reps)

\* significant at  $p < 0.05$  level

**Table A12:** Regressions of entitlement and narcissism on experimental treatments, with controls. 2020 MTurk.

|                            | Self-induced       |                    | Elite Message      |                    |
|----------------------------|--------------------|--------------------|--------------------|--------------------|
|                            | Entitlement        | Narcissism         | Entitlement        | Narcissism         |
| Treatment                  | 0.032<br>(0.029)   | 0.043<br>(0.028)   | 0.010<br>(0.025)   | 0.013<br>(0.027)   |
| Partisanship               | 0.058<br>(0.041)   | 0.124*<br>(0.044)  |                    |                    |
| Independent Identification |                    |                    | -0.073<br>(0.057)  | -0.076<br>(0.064)  |
| Education                  | 0.082<br>(0.069)   | 0.129<br>(0.063)   | 0.110<br>(0.083)   | 0.105<br>(0.073)   |
| Age                        | -0.120<br>(0.060)  | -0.330*<br>(0.051) | -0.171*<br>(0.057) | -0.275*<br>(0.050) |
| Income                     | -0.050<br>(0.055)  | -0.082<br>(0.058)  | -0.122*<br>(0.054) | -0.104<br>(0.054)  |
| Female                     | -0.002<br>(0.025)  | -0.014<br>(0.023)  | -0.015<br>(0.024)  | -0.029<br>(0.025)  |
| White                      | -0.169*<br>(0.033) | -0.090*<br>(0.029) | -0.150*<br>(0.034) | -0.103*<br>(0.030) |
| Constant                   | 0.561*<br>(0.060)  | 0.432*<br>(0.061)  | 0.629*<br>(0.057)  | 0.526*<br>(0.059)  |
| $R^2$                      | 0.124              | 0.150              | 0.125              | 0.121              |
| $n$                        | 281                | 281                | 340                | 340                |

\* significant at  $p < 0.05$  level

**Table A13:** Characteristics of respondents randomly assigned to either the treatment or control group. 2020 MTurk.

| Characteristic (range)  | Control | Self-Induced Treatment | Elite Message Treatment |
|-------------------------|---------|------------------------|-------------------------|
| Age (18-79)             | 40.01   | 38.82                  | 39.07                   |
| Household income (1-24) | 6.82    | 6.50                   | 7.05                    |
| Female (%)              | 47.00   | 57.66                  | 47.03                   |
| White (%)               | 75.00   | 74.77                  | 75.74                   |
| Party ID (1-7)          | 3.76    | 3.69                   | 3.67                    |
| Ideology (1-7)          | 3.85    | 3.61                   | 3.70                    |



## References

Fornell, Claes & David F. Larker. 1981. "Evaluating Structural Equation Models with Unobservable Variables and Measurement Error." *Journal of Marketing Research* 18(1):39–50.
